# Supplementary material
Source: publisher figshare collection journal article supplement (https://tandf.figshare.com/articles/dataset/_/13242214)
Supplement: Supplementary file 1 [file 1]

**Supplementary file 2: Full text screening for qualitative synthesis**

Through full text screening, articles were sorted and color-coded as either included or excluded with **specified reason for exclusion**.

1. Binge AbbateDaga G., Quaranta M., Marzola E., Amianto F., & Fassino, S. (2015). The relationship between alexithymia and intolerance of uncertainty in anorexia nervosa. Psychopathology, 48(3), 202-208.
2. Adenzato, M., Todisco, P., & Ardito, R. B. (2012). Social cognition in anorexia nervosa: Evidence of preserved theory of mind and impaired emotional functioning. PloS One, 7(8), e44414.
3. **Foreign language:** Alcantara, K. E. G., & Gutierrez, C. S. (2016). Theory of mind in women with and without eating disorders. Teoria De La Mente En Mujeres Con y Sin Trastornos De La Conducta Alimentaria., 62(1), 15-23
4. Aloi, M., Rania, M., Caroleo, M., De Fazio, P., & Segura-Garcia, C. (2017). Social cognition and emotional functioning in patients with binge eating disorder. European Eating Disorders Review: The Journal of the Eating Disorders Association, 25(3), 172-178.
5. Amianto, F., Bertorello, A., Migliore, F., Abbate-Daga, G., & Fassino, S. (2016). Alexithymia in anorexia and bulimia: Ubiquitous and primary trait? Cogent Psychology, 3(1)
6. **Totalscore not disclosed:** Ballarotto G., Porreca A., Erriu M., Ronconi L., Cimino S., Cerniglia L., et al. (2017). Does alexithymia have a mediating effect between impulsivity and emotional-behavioural functioning in adolescents with binge eating disorder?. Clinical Neuropsychiatry, 14(4), 247-256.
7. Beadle, J. N., Paradiso, S., Salerno, A., & McCormick, L. M. (2013). Alexithymia, emotional empathy, and self-regulation in anorexia nervosa. Annals of Clinical Psychiatry : Official Journal of the American Academy of Clinical Psychiatrists, 25(2), 107-120.
8. Bourke, M. P., Taylor, G. J., Parker, J. D., & Bagby, R. M. (1992). Alexithymia in women with anorexia nervosa. A preliminary investigation. The British Journal of Psychiatry : The Journal of Mental Science, 161, 240-243.
9. **Full-text inaccessible:** Burrows, B. A. (1988). An analysis of interoceptive awareness and coping abilities among bulimic and normal women. Dissertation Abstracts International, 48(9-), 2242-2242.
10. **Imcomparrable results:** Bydlowski, S., Corcos, M., Jeammet, P., Paterniti, S., Berthoz, S., Laurier, C., et al. (2005). Emotion-processing deficits in eating disorders. The International Journal of Eating Disorders, 37(4), 321-329.
11. **Irrelevant test tool:** Cserjesi, R., Vermeulen, N., Lenard, L., & Luminet, O. (2011). Reduced capacity in automatic processing of facial expression in restrictive anorexia nervosa and obesity. Psychiatry Research, 188(2), 253-257.
12. **Full-text inaccessible:** Cucchi, A. (2016). Differences in mentalising ability in individuals presenting with eating disorders with and without concurrent self-harm: A comparative study. Counselling Psychology Review, 31(1), 38-49.
13. Dapelo M.M., Surguladze S., Morris R., & Tchanturia, K. (2016). Emotion recognition in blended facial expressions in women with anorexia nervosa. European Eating Disorders Review, 24(1), 34-42.
14. **Foreign language:** De Panfilis, C., Salvatore, P., Avanzini, M., Gariboldi, S., & Maggini, C. (2001). Alexithymia in eating disorders: A personality disturbance? Psichiatria e Psicoterapia Analitica, 20(4), 349-361.
15. De Panfilis, C., Rabbaglio, P., Rossi, C., Zita, G., & Maggini, C. (2003). Body image disturbance, parental bonding and alexithymia in patients with eating disorders. Psychopathology, 36(5), 239-246.
16. de Zwaan, M., Bach, M., Mitchell, J. E., Ackard, D., Specker, S. M., Pyle, R. L., et al. (1995). Alexithymia, obesity, and binge eating disorder. The International Journal of Eating Disorders, 17(2), 135-140.
17. de Zwaan, M., Biener, D., Bach, M., Wiesnagrotzki, S., & Stacher, G. (1996). Pain sensitivity, alexithymia, and depression in patients with eating disorders: Are they related? Journal of Psychosomatic Research, 41(1), 65-70.
18. **Foreign language:** Deborde, A. S., Berthoz, S., Godart, N., Perdereau, F., Corcos, M., & Jeammet, P. (2006). Relations between alexithymia and anhedonia: A study in eating disordered and control subjects. [Etude des relations entre alexithymie et anhedonie chez des femmes presentant des troubles du comportement alimentaire et chez des temoins] L'Encephale, 32(1 Pt 1), 83-91.
19. **Foreign language:** Deborde, A. S., Berthoz, S., Perdereau, F., Godart, N., Corcos, M., & Jeammet, P. (2004). Validity of the BVAQ: A study in eating disorder patients and controls. [Validite du questionnaire d'alexithymie de Bermond et Vorst: etude chez des sujets presentant des troubles du comportement alimentaire et chez des temoins] L'Encephale, 30(5), 464-473.
20. Deborde, A. S., Berthoz, S., Wallier, J. M., Fermanian, J., Falissard, B., Jeammet, P., et al. (2008). The bermond-vorst alexithymia questionnaire cutoff scores: A study in eating-disordered and control subjects. Psychopathology, 41(1), 43-49.
21. **Foreign language:** Dethieux J.B., Hazane F., Dounet C., Gentil V., & Raynaud, J. P. (2001). In search of lost emotions: Adolescents with anorexia nervosa and their fathers (a preliminary study about the hypothesis of alexithymia). [A la recherche des emotions perdues : L'adolescente anorexique et son pere. Etude preliminaire a propos de l'hypothese alexithymique.] Neuropsychiatrie De l'Enfance Et De l'Adolescence, 49(2), 131-140.
22. **Foreign language:** Eizaguirre, A. E., de Cabezon, Maria Asuncion,Ortego Saenz, de Alda, I. O., de Apellaniz, M., & Mendez, A. A. (2001). Alexithymia, family and eating disorders. Alexitimia, Familia y Trastornos Alimentarios., 17(1), 139-149.
23. Eizaguirre, A. E., Saenz, d. C., Alda, I. O. d., Olariaga, L. J., & Juaniz, M. (2004). Alexithymia and its relationships with anxiety and depression in eating disorders. Personality and Individual Differences, 36(2), 321-331.
24. **Missing normative healthy controls / Erratum:** Erratum: Toronto alexithymia scale for patients with eating disorder: Performance using the non-parametric item response theory (comprehensive psychiatry (2014) 55 (1285-1291)).(2014). Comprehensive Psychiatry, 55(6), 1478.
25. **Foreign language:** Espina Eizaguirre, A., Ortega Saenz de Cabezon, Maria,A., & Ochoa de, A. M. (2001). A controlled essay of familiar interventions in eating disorders: Changes in alexithymia. Un Ensayo Controlado De Intervenciones Familiares En Trastornos Alimentarios.Cambios En Alexitimia., 17(2), 64-72.
26. **Foreign language:** Espina, A., Ortego, A., Ochoa, d. A., & Aleman, A. (2002). Alexithymia in eating disorders. Alexitimia En Los Trastornos Alimentarios., 28(117), 25-42.
27. **Foreign lanugage:** Faree Merono, C., Font, M., Perez-Salamero, M., & Toro, J. (1998). Alexithymia ratings in anorexia nervosa. Tasas De Alexitimia En Anorexia Nerviosa., 4, 225-230.
28. **Patient groups not seperated:** Fonagy, P., Luyten, P., Moulton-Perkins, A., Lee, Y. W., Warren, F., Howard, S., et al. (2016). Development and validation of a self-report measure of mentalizing: The reflective functioning questionnaire. PloS One, 11(7), e0158678.
29. **Total score not disclosed:** GilboaSchechtman E., Avnon L., Zubery E., & Jeczmien, P. (2006). Emotional processing in eating disorders: Specific impairment or general distress related deficiency?. Depression and Anxiety, 23(6), 331-339.
30. **Irrelevant test tool:** Gillberg, I. C., Billstedt, E., Wentz, E., Anckarsater, H., Rastam, M., & Gillberg, C. (2010). Attention, executive functions, and mentalizing in anorexia nervosa eighteen years after onset of eating disorder. Journal of Clinical and Experimental Neuropsychology, 32(4), 358-365.
31. Goddard, E., & Treasure, J. (2013). Anxiety and social-emotional processing in eating disorders: Examination of family trios. Cognitive Therapy and Research, 37(5), 890-904.
32. Goddard, E., Carral-Fernandez, L., Denneny, E., Campbell, I. C., & Treasure, J. (2014). Cognitive flexibility, central coherence and social emotional processing in males with an eating disorder. The World Journal of Biological Psychiatry, 15(4), 317-326.
33. Gramaglia, C., Ressico, F., Gambaro, E., Palazzolo, A., Mazzarino, M., Bert, F., et al. (2016). Alexithymia, empathy, emotion identification and social inference in anorexia nervosa: A case-control study. Eating Behaviors, 22, 46-50.
34. Excluded due to risk of dublication of data sets: Harrison A., Sullivan S., Tchanturia K., & Treasure, J. (2010). Emotional functioning in eating disorders: Attentional bias, emotion recognition and emotion regulation. Psychological Medicine, , 1-11.
35. Harrison A., Tchanturia K., & Treasure, J. (2010). Attentional bias, emotion recognition, and emotion regulation in anorexia: State or trait?. Biological Psychiatry, 68(8), 755-761.
36. Harrison, A., Sullivan, S., Tchanturia, K., Treasure Kate, & ORCID: http://orcidorg/0000-0001-8988-3265, J.,A.I. (2009). Emotion recognition and regulation in anorexia nervosa. Clinical Psychology & Psychotherapy, 16(4), 348-356.
37. **Total score not disclosed:** Harrison, A., Tchanturia, K., Naumann, U., Treasure Kate, & ORCID: http://orcidorg/0000-0001-8988-3265, J.,A.I. (2012). Social emotional functioning and cognitive styles in eating disorders. British Journal of Clinical Psychology, 51(3), 261-279.
38. **Missing normative healthy controls:** Iancu, I., Cohen, E., Yehuda, Y. B., & Kotler, M. (2006). Treatment of eating disorders improves eating symptoms but not alexithymia and dissociation proneness. Comprehensive Psychiatry, 47(3), 189-193.
39. **Foreign language:** Ilabaca P.T., & Letelier, C. O. (1997). Alexithymia in anorexia nervosa and bulimia nervosa. [Alexitimia en anorexia nerviosa y bulimia nerviosa.] Revista Chilena De Neuro-Psiquiatria, 35(4), 579-584.
40. James, A. S. (2014). An exploration of the social neuroscience of empathy and autism spectrum disorder behaviors in anorexia nervosa. Dissertation Abstracts International: Section B: The Sciences and Engineering, 74(10-), No-Specified.
41. **Irrelevant test tool:** Jansch, C., Harmer, C., Cooper Catherine, & ORCID: http://orcidorg/0000-0002-1609-8335, M.,J.A.I. (2009). Emotional processing in women with anorexia nervosa and in healthy volunteers. Eating Behaviors, 10(3), 184-191.
42. **Missing normative healthy controls:** Jermakow N., & Brzezicka, A. (2016). How autistic are anorectic females? similarities and differences between anorexia nervosa and autism spectrum disorders. Clinical Neuropsychiatry, 13(4-5), 53-58
43. Kanakam N., Krug I., Raoult C., Collier D., & Treasure, J. (2013). Social and emotional processing as a behavioural endophenotype in eating disorders: A pilot investigation in twins. European Eating Disorders Review, 21(4), 294-307.
44. Kenyon, M., Samarawickrema, N., Dejong, H., Van den Eynde, F., Startup, H., Lavender, A., et al. (2012). Theory of mind in bulimia nervosa. The International Journal of Eating Disorders, 45(3), 377-384.
45. Kessler, H., Schwarze, M., Filipic, S., Traue, H. C., & von Wietersheim, J. (2006). Alexithymia and facial emotion recognition in patients with eating disorders. The International Journal of Eating Disorders, 39(3), 245-251.
46. Kucharska, K., Jeschke, J., & Mafi, R. (2016). Intact social cognitive processes in outpatients with anorexia nervosa: A pilot study. Annals of General Psychiatry, 15(1), 24-016-0108-0. eCollection 2016.
47. Kuipers, G. S., van Loenhout, Z., van der Ark, L. A., & Bekker, M. H. (2016). Attachment insecurity, mentalization and their relation to symptoms in eating disorder patients. Attachment & Human Development, 18(3), 250-272.
48. Laghi, F., Pompili, S., Zanna, V., Castiglioni, M. C., Criscuolo, M., Chianello, I., et al. (2015). Are adolescents with anorexia nervosa better at reading minds? Cognitive Neuropsychiatry, 20(6), 489-501.
49. Lule, D., Schulze, U. M., Bauer, K., Scholl, F., Muller, S., Fladung, A. K., et al. (2014). Anorexia nervosa and its relation to depression, anxiety, alexithymia and emotional processing deficits. Eating and Weight Disorders : EWD, 19(2), 209-216.
50. **Total score not disclosed:** Marsero, S., Ruggiero, G. M., Scarone, S., Bertelli, S., & Sassaroli, S. (2011). The relationship between alexithymia and maladaptive perfectionism in eating disorders: A mediation moderation analysis methodology. Eating and Weight Disorders : EWD, 16(3), e182-7.
51. Maxwell, H., Tasca, G. A., Grenon, R., Faye, M., Ritchie, K., Bissada, H., et al. (2017). The role of coherence of mind and reflective functioning in understanding binge-eating disorder and co-morbid overweight. Attachment & Human Development, 19(4), 407-424.
52. Medina-Pradas, C., Navarro, J. B., Alvarez-Moya, E., Grau, A., & Obiols, J. E. (2012). Emotional theory of mind in eating disorders. International Journal of Clinical and Health Psychology, 12(2), 189-202.
53. Montebarocci, O., Codispoti, M., Surcinelli, P., Franzoni, E., Baldaro, B., & Rossi, N. (2006). Alexithymia in female patients with eating disorders. Eating and Weight Disorders : EWD, 11(1), 14-21.
54. **Foreign language:** Montrasio C., Albanese N.D., Uccellini O., & Salvioni, E. (2006). Anorexia nervosa and alexithymia: Clinic study in an adolescent sample. [Anoressia ed alessitimia: Studio clinico in eta evolutiva.] Imago, 13(2), 93-103.
55. **No assesment of eating disorder diagnosis:** Morosin, A., & Riva, G. (1997). Alexithymia in a clinical sample of obese women. Psychological Reports, 80(2), 387-394.
56. Nandrino, J. L., Berna, G., Hot, P., Dodin, V., Latree, J., Decharles, S., et al. (2012). Cognitive and physiological dissociations in response to emotional pictures in patients with anorexia. Journal of Psychosomatic Research, 72(1), 58-64.
57. **Irrelevant test tool:** Palomba, D., Venturini, M., Rausa, M., Contin, S. A., Penolazzi, B., Schumann, R., et al. (2017). Reduced sympathetic activity and dysfunctional metacognition in patients with anorexia nervosa: A preliminary study. Journal of Evidence-Based Psychotherapies, 17(1), 1-19.
58. Panfilis, C. D., Rabbaglio, P., Rossi, C., Zita, G., & Maggini, C. (2003). Body image disturbance, parental bonding and alexithymia in patients with eating disorders. Psychopathology, 36(5), 239-246.
59. Parling, T., Mortazavi, M., & Ghaderi, A. (2010). Alexithymia and emotional awareness in anorexia nervosa: Time for a shift in the measurement of the concept? Eating Behaviors, 11(4), 205-210.
60. Pedersen, S. H., Lunn, S., Katznelson, H., & Poulsen, S. (2012). Reflective functioning in 70 patients suffering from bulimia nervosa. European Eating Disorders Review : The Journal of the Eating Disorders Association, 20(4), 303-310.
61. Provini F., Antelmi E., Marcatelli M., Cardetti S., Vinai L., Vinai P., et al. (2015). Alexithymia is not related to severity of night eating behavior: A useful distinction from other eating disorders. Eating Behaviors, 17, 94-98.
62. **Total score not disclosed:** RothschildYakar L., Eviatar Z., Shamia A., & Gur, E. (2011). Social cognition in eating disorders: Encoding and representational processes in binging and purging patients. European Eating Disorders Review, 19(1), 75-84.
63. **Imcomparrable results:** Rozenstein, M. H., Latzer, Y., Stein, D., & Eviatar, Z. (2011). Perception of emotion and bilateral advantage in women with eating disorders, their healthy sisters, and nonrelated healthy controls. Journal of Affective Disorders, 134(1-3), 386-395.
64. Russell, T. A., Schmidt, U., Doherty, L., Young, V., & Tchanturia, K. (2009). Aspects of social cognition in anorexia nervosa: Affective and cognitive theory of mind. Psychiatry Research, 168(3), 181-185.
65. **Foreign language:** Sagardoy, R. C., Solorzano, G., Morales, C., Kassem, M. S., Codesal, R., Blanco, A., et al. (2014). Emotional processing in adult and adolescent ED patients. emotional recognition and regulation. Procesamiento Emocional En Pacientes TCA Adultas Vs.Adolescentes.Reconocimiento y Regulacion Emocional., 25(1), 19-37.
66. Schmidt, U., Jiwany, A., & Treasure, J. (1993). A controlled study of alexithymia in eating disorders. Comprehensive Psychiatry, 34(1), 54-58.
67. **Imcomparrable results:** Schulte-Ruther, M., Mainz, V., Fink, G. R., Herpertz-Dahlmann, B., & Konrad, K. (2012). Theory of mind and the brain in anorexia nervosa: Relation to treatment outcome. Journal of the American Academy of Child and Adolescent Psychiatry, 51(8), 832-841.e11.
68. Sexton, M. C., Sunday, S. R., Hurt, S., & Halmi, K. A. (1998). The relationship between alexithymia, depression, and axis II psychopathology in eating disorder inpatients. The International Journal of Eating Disorders, 23(3), 277-286.
69. **Irrelevant test tool:** Sfarlea, A., Greimel, E., Platt, B., Dieler, A. C., & Schulte-Korne, G. (2017). Recognition of emotional facial expressions in adolescents with anorexia nervosa and adolescents with major depression. Psychiatry Research,
70. Speranza, M., Corcos, M., Loas, G., Stephan, P., Guilbaud, O., Perez-Diaz, F., et al. (2005). Depressive personality dimensions and alexithymia in eating disorders. Psychiatry Research, 135(2), 153-163.
71. Sureda B., Valdes M., Jodar I., & De Pablo, J. (1999). Alexithymia, type A behaviour and bulimia nervosa. European Eating Disorders Review, 7(4), 286-292.
72. Tapajoz P de Sampaio, F., Soneira, S., Aulicino, A., Martese, G., Iturry, M., & Allegri, R. F. (2013a). Theory of mind and central coherence in eating disorders: Two sides of the same coin? Psychiatry Research, 210(3), 1116-1122.
73. **Excluded due to risk of dublication of data sets:** Tapajoz Pereira de Sampaio, F., Soneira, S., Aulicino, A., & Allegri, R. F. (2013b). Theory of mind in eating disorders and their relationship to clinical profile. European Eating Disorders Review : The Journal of the Eating Disorders Association, 21(6), 479-487.
74. Taylor, G. J., Parker, J. D., Bagby, R. M., & Bourke, M. P. (1996). Relationships between alexithymia and psychological characteristics associated with eating disorders. Journal of Psychosomatic Research, 41(6), 561-568.
75. **Foreign language:** Torres S., Guerra M.P., Lencastre L., Vieira F., RomaTorres A., & Brandao, I. (2011). Prevalence of alexithymia in anorexia nervosa and its association with clinical and sociodemographic variables. [Prevalencia da alexitimia na anorexia nervosa e sua associacao com variaveis clinicas e sociodemograficas.] Jornal Brasileiro De Psiquiatria, 60(3), 182-189.
76. Torres, S., Guerra, M. P., Lencastre, L., Miller, K., Vieira, F. M., Roma-Torres, A., et al. (2015). Alexithymia in anorexia nervosa: The mediating role of depression. Psychiatry Research, 225(1-2), 99-107.
77. **Excluded due to risk of dublication of data sets:** Torres, S., Guerra, M. P., Lencastre, L., Roma-Torres, A., Brandao, I., Queiros, C., et al. (2011). Cognitive processing of emotions in anorexia nervosa. European Eating Disorders Review : The Journal of the Eating Disorders Association, 19(2), 100-111.
78. Troop, N. A., Schmidt, U. H., & Treasure, J. L. (1995). Feelings and fantasy in eating disorders: A factor analysis of the toronto alexithymia scale. The International Journal of Eating Disorders, 18(2), 151-157.
79. **Erratum:** Zonnevijlle-Bender, M., van Goozen, ,S.H.M., Cohen-Kettenis, P., van Elburg, A., & van Engeland, H. (2002). "Do adolescent anorexia nervosa patients have deficits in emotional functioning": Erratum. European Child & Adolescent Psychiatry, 11(2), 99-99.
80. Zonnevijlle-Bender, M. J., van Goozen, S. H., Cohen-Kettenis, P. T., van Elburg, A., & van Engeland, H. (2002). Do adolescent anorexia nervosa patients have deficits in emotional functioning? European Child & Adolescent Psychiatry, 11(1), 38-42.
81. Zonnevylle-Bender, M. J., van Goozen, S. H., Cohen-Kettenis, P. T., van Elburg, T. A., & van Engeland, H. (2004). Emotional functioning in adolescent anorexia nervosa patients--a controlled study. European Child & Adolescent Psychiatry, 13(1), 28-34.
